# Supplementary material for: Effects of Molecular Crowding on the Dynamics of Intrinsically Disordered Proteins
Source: PubMed Central journal article supplement (PMC3506533; doi:10.1371/journal.pone.0049876), 2012-11-26
Supplement: pone.0049876.s001.pdf [file pone.0049876.s001.pdf]

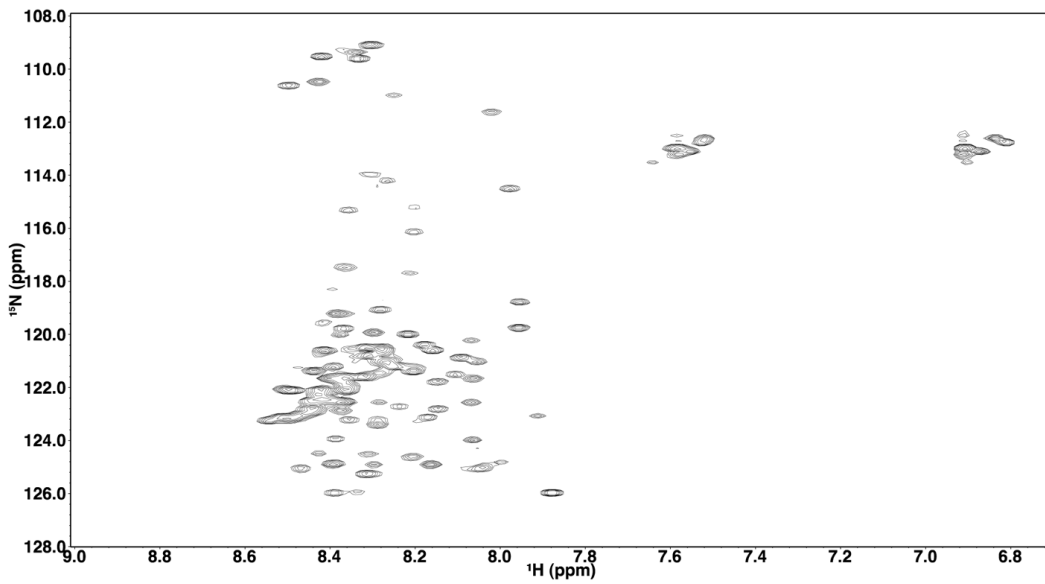

Figure S1.  $^1\text{H}$ - $^{15}\text{N}$  HSQC spectrum of ProT $\alpha$  in 400 g/L Ficoll 70. The sample contained 0.3 mM ProT $\alpha$  in 50 mM NaPO $_4$  pH 7, 100 mM NaCl and 1 mM DTT.
