# Supplementary material for: Effects of Molecular Crowding on the Dynamics of Intrinsically Disordered Proteins
Source: PubMed Central journal article supplement (PMC3506533; doi:10.1371/journal.pone.0049876), 2012-11-26
Supplement: pone.0049876.s002.pdf [file pone.0049876.s002.pdf]

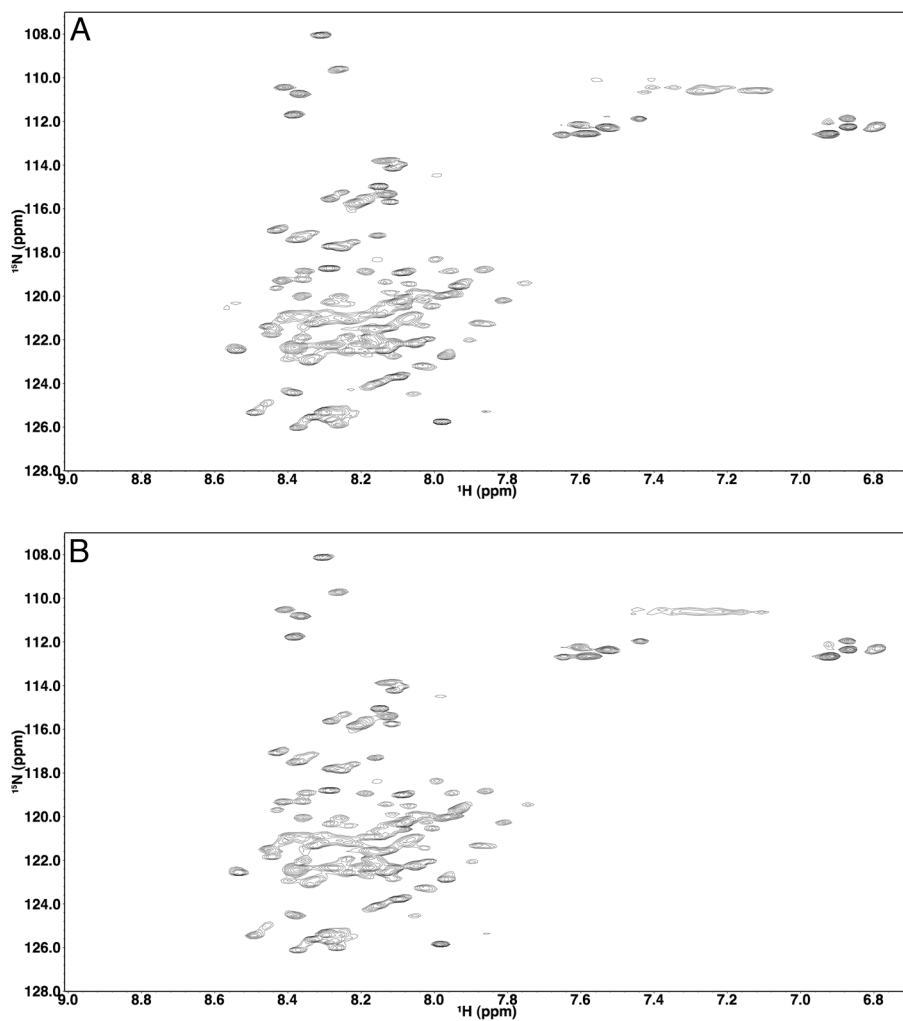

Figure S2.  $^1\text{H}$ - $^{15}\text{N}$  HSQC spectra of TC-1 in 400 g/L Ficoll 70 and Dextran 70. The samples contained 0.2 mM TC-1 in 10 mM sodium acetate pH 5 and 400 g/L Ficoll 70 (A) or Dextran 70 (B).
