# Supplementary material for: Effects of Molecular Crowding on the Dynamics of Intrinsically Disordered Proteins
Source: PubMed Central journal article supplement (PMC3506533; doi:10.1371/journal.pone.0049876), 2012-11-26
Supplement: pone.0049876.s003.pdf [file pone.0049876.s003.pdf]

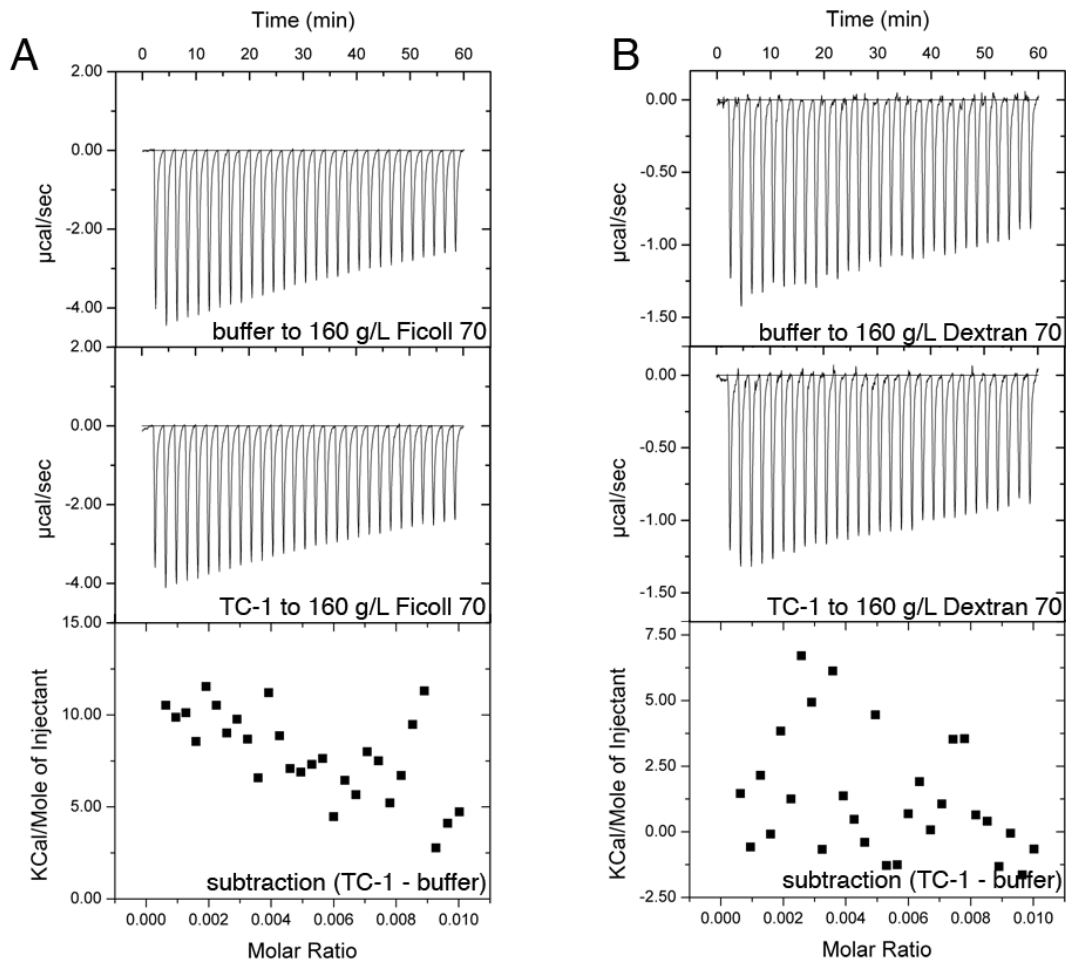

Figure S3. ITC profiles of TC-1 titrations into crowded solutions. Buffer (10 mM sodium acetate pH 5) alone or containing 0.1 mM TC-1 was titrated into the cell, containing 160 g/L Ficoll (A) or Dextran 70 (B) in the same buffer. 10  $\mu\text{L}$  injections were used with 120-second delays.
