# Supplementary material for: Effects of Molecular Crowding on the Dynamics of Intrinsically Disordered Proteins
Source: PubMed Central journal article supplement (PMC3506533; doi:10.1371/journal.pone.0049876), 2012-11-26
Supplement: pone.0049876.s004.pdf [file pone.0049876.s004.pdf]

Figure S4.  $R_1$ ,  $R_2$  and NOE values for TC-1 in buffer and 160 g/L Ficoll 70 and Dextran 70 plotted by residue number. The samples contained 10 mM sodium acetate pH 5 in absence and presence of 160 g/L Ficoll 70 or Dextran 70.
