# Supplementary material for: Effects of Molecular Crowding on the Dynamics of Intrinsically Disordered Proteins
Source: PubMed Central journal article supplement (PMC3506533; doi:10.1371/journal.pone.0049876), 2012-11-26
Supplement: pone.0049876.s005.pdf [file pone.0049876.s005.pdf]

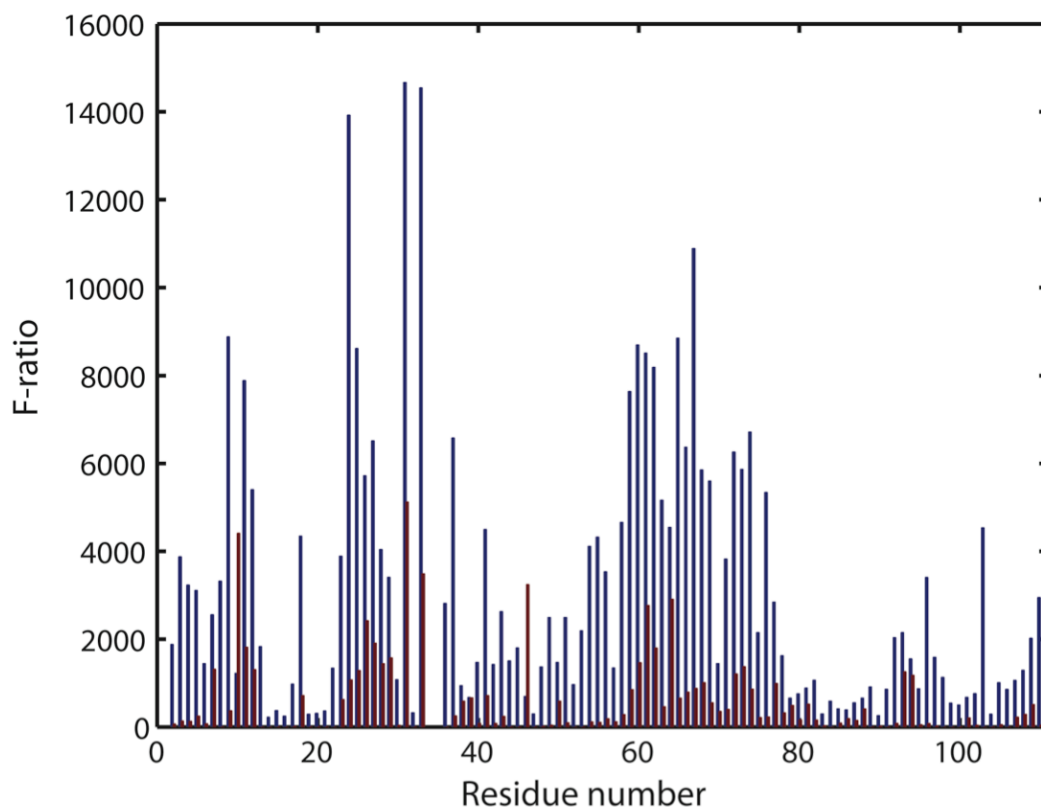

Figure S5. Comparison of the fitting of autocorrelations to 2-, 3-, and 4-exponential decay curves. Blue:  $F$ -ratios calculated from the  $\chi^2$  and degrees of freedom of 2- and 3-exponential models; Red:  $F$ -ratios calculated from the  $\chi^2$  and degrees of freedom of 3- and 4-exponential models (Equation 4).
